# Supplementary material
Source: PubMed Central journal article supplement (PMC9679113)
Supplement: 42770_2022_848_MOESM2_ESM.pdf [file 42770_2022_848_MOESM2_ESM.pdf]

## SUPPLEMENTAL TABLE

### **Data Availability**

GISAID Identifier: EPI\_SET\_20220719oa

doi: [10.55876/gis8.220719oa](https://doi.org/10.55876/gis8.220719oa)

All genome sequences and associated metadata in this dataset are published in GISAID's EpiCoV database. To view the contributors of each individual sequence with details such as accession number, Virus name, Collection date, Originating Lab and Submitting Lab and the list of Authors, visit [10.55876/gis8.220719oa](https://gisaid.org/WIV04)

### **Data Snapshot**

- EPI\_SET\_20220719oa is composed of 1,468 individual genome sequences.
- The collection dates range from 2020-07-07 to 2022-07-11;
- Data were collected in 145 countries and territories;
- All sequences in this dataset are compared relative to hCoV-19/Wuhan/WIV04/2019 (WIV04), the official reference sequence employed by GISAID (EPI\_ISL\_402124). Learn more at <https://gisaid.org/WIV04>.
